# Supplementary material
Source: MDPI journal article supplement (https://www.mdpi.com/2227-9717/9/9/1569)
Supplement: s1 [file s1]

# Inverse Molecular Design Techniques for Green Chemical Design in Integrated Biorefineries

Jamie W. Y. Lee<sup>1</sup>, Lik Yin Ng<sup>1</sup>, Viknesh Andiappan<sup>1</sup>, Nishanth G. Chemmangattuvalappil<sup>2</sup>, Denny K. S. Ng<sup>1,\*</sup>

## Supplementary material

The application of the developed two-stage optimization approach is demonstrated by reworking the design and production problem of biobased fuel taken from Ng et al. [1]. Information in Table A1, A2 and A3 are obtained by referring to the work published by Ng et al. [1], while potency factor in Table A4 is identified through incremental environmental burden assessment presented by Andiappan et al. [2].

**Table S1.** List of Conversion Pathway to produce Alkane from Biomass

| Pathway | Feed     | Process                   | Product        | Conversion (%) | Selectivity (%) |
|---------|----------|---------------------------|----------------|----------------|-----------------|
| 1       | Biomass  | Ammonia Explosion         | Sugars, Lignin | 98             | -               |
| 2       | Biomass  | Steam Explosion           | Sugars, Lignin | 49.2           | -               |
| 3       | L, C, H  | Organosolv Separation     | Lignin         | 79.0*          | -               |
| 4       | L, C, H  | Organosolv Separation     | Sugars         | 97.0*          | -               |
| 5       | Sugars   | Autohydrolysis            | HMF            | 90.9           | -               |
| 6       | Sugars   | Dehydration of Sugars     | Furfural       | 40.9           | -               |
| 7       | Sugars   | Yeast Fermentation        | Ethanol        | 61.9           | -               |
| 8       | Sugars   | Bacterial Fermentation    | Ethanol        | 41             | -               |
| 9       | Furfural | Hydrogenation of Furfural | THFA           | 98.2           | -               |
| 10      | THFA     | Hydrogenation of THFA 1   | 1,5-PeD        | 99.0           | 95.0            |
|         |          |                           | PeOH           |                | 4.0             |
| 11      | THFA     | Hydrogenation of THFA 2   | 1,5-PeD        | 60.0           | 51.0            |
|         |          |                           | PeOH           |                | 22.0            |
| 12      | Biomass  | Pyrolysis                 | Syngas         | 94             | -               |
| 13      | Biomass  | Gasification              | Syngas         | 90             | -               |
| 14      | Biomass  | Anaerobic Digestion       | Methane        | 40             | -               |
| 15      | Biomass  | Water Gas Shift Reaction  | Syngas         | 100            | -               |

**Table S1 (continued).** List of Conversion Pathway to produce Alkane from Biomass

|    |          |                                       |                                                                                          |       |      |
|----|----------|---------------------------------------|------------------------------------------------------------------------------------------|-------|------|
| 16 | Syngas   | Fischer-Tropsch 1                     | Hydrocarb<br>on C <sub>2</sub> -C <sub>4</sub>                                           | 40.0  | 16.0 |
|    |          |                                       | Hydrocarb<br>on C <sub>5</sub> -C <sub>9</sub>                                           |       | 27.0 |
|    |          |                                       | Hydrocarb<br>on C <sub>10</sub> -C <sub>13</sub>                                         |       | 26.0 |
| 17 | Syngas   | Fischer Tropsch 2                     | Hydrocarb<br>on C <sub>2</sub> -C <sub>4</sub>                                           | 75.0  | 23.0 |
|    |          |                                       | Hydrocarb<br>on C <sub>5</sub> -C <sub>9</sub>                                           |       | 19.0 |
|    |          |                                       | Hydrocarb<br>on C <sub>10</sub> -C <sub>13</sub>                                         |       | 9.7  |
| 18 | Syngas   | Conversion of Syngas 1                | Methanol                                                                                 | 25.1  | 2.6  |
|    |          |                                       | Ethanol                                                                                  |       | 61.4 |
| 19 | Syngas   | Conversion of Syngas 2                | Methanol                                                                                 | 24.6  | 3.9  |
|    |          |                                       | Ethanol                                                                                  |       | 56.1 |
| 20 | Syngas   | Hydrogenation of CO                   | Methanol                                                                                 | 28.8  | 20.7 |
|    |          |                                       | Ethanol                                                                                  |       | 23.8 |
|    |          |                                       | Propanol                                                                                 |       | 14.1 |
|    |          |                                       | Butanol                                                                                  |       | 7.5  |
| 21 | Alcohols | Monsanto Process                      | Ethanoic<br>Acid                                                                         | 99    | -    |
| 22 | Alcohols | Dehydration of<br>Alcohols 1          | Ethane                                                                                   | 67.0  | 1.0  |
| 23 | Alcohols | Dehydration of Alcohols<br>2          | Propane                                                                                  | 59.0  | 40.0 |
|    |          |                                       | Butane                                                                                   |       | 13.0 |
| 24 | Alcohols | Dehydration of Alcohols<br>3          | Pentane                                                                                  | 64.0  | 50.0 |
|    |          |                                       | Hexane                                                                                   |       | 6.0  |
|    |          |                                       | Heptane                                                                                  |       | 8.0  |
|    |          |                                       | Hydrocarb<br>on C <sub>10</sub> -<br>C <sub>12</sub>                                     |       | 48.0 |
| 25 | Acids    | Decarboxylation of<br>Acids           | Ethane                                                                                   | 62.0  | 21.3 |
| 26 | Alkanes  | Fractional Distillation of<br>Alkanes | Hydrocarb<br>on C <sub>8</sub>                                                           | 99.0* | -    |
|    |          |                                       | Hydrocarb<br>on C <sub>2</sub> -<br>C <sub>9</sub> ,C <sub>10</sub> -<br>C <sub>13</sub> | 99.0* | -    |

**Table S2.** Price List for Product and Feedstock

| Category        | Component   | Price (USD/tonne) |
|-----------------|-------------|-------------------|
| Feedstock       | Biomass     | 170               |
| Alkane Product  | Ethane      | 490               |
|                 | Propane     | 750               |
|                 | Butane      | 1000              |
|                 | Pentane     | 1200              |
|                 | Hexane      | 1600              |
|                 | Heptane     | 1800              |
|                 | Octane      | 2000              |
|                 | Nonane      | 2100              |
|                 | Decane      | 2300              |
|                 | Undecane    | 2500              |
| Alcohol Product | Methanol    | 450               |
|                 | Ethanol     | 770               |
|                 | Propanol    | 950               |
|                 | Butanol     | 1120              |
|                 | Pentanol    | 1770              |
|                 | Pentanediol | 3000              |

**Table S3.** List of Capital and Operating Cost for Conversion Pathways

| <b>Pathway</b> | <b>Process</b>                     | <b>Capital Cost<br/>(USD/yr)</b> | <b>Operating Cost<br/>(USD/yr)</b> |
|----------------|------------------------------------|----------------------------------|------------------------------------|
| 1              | Ammonia Explosion                  | 19.64                            | 11.26                              |
| 2              | Steam Explosion                    | 13.90                            | 7.97                               |
| 3              | Organosolv Separation              | 40.68                            | 23.31                              |
| 4              | Organosolv Separation              | 40.68                            | 23.31                              |
| 5              | Autohydrolysis                     | 63.46                            | 36.37                              |
| 6              | Dehydration of Sugars              | 27.62                            | 15.83                              |
| 7              | Yeast Fermentation                 | 40.62                            | 23.27                              |
| 8              | Bacterial Fermentation             | 31.43                            | 18.01                              |
| 9              | Hydrogenation of Furfural          | 30.22                            | 17.32                              |
| 10             | Hydrogenation of THFA 1            | 43.52                            | 24.94                              |
| 11             | Hydrogenation of THFA 2            | 45.45                            | 26.05                              |
| 12             | Pyrolysis                          | 62.86                            | 36.02                              |
| 13             | Gasification                       | 86.43                            | 55.00                              |
| 14             | Anaerobic Digestion                | 26.23                            | 15.03                              |
| 15             | Water Gas Shift Reaction           | 15.11                            | 8.66                               |
| 16             | Fischer-Tropsch 1                  | 193.41                           | 110.83                             |
| 17             | Fischer Tropsch 2                  | 181.93                           | 104.25                             |
| 18             | Conversion of Syngas 1             | 38.56                            | 22.10                              |
| 19             | Conversion of Syngas 2             | 41.10                            | 23.55                              |
| 20             | Hydrogenation of CO                | 40.19                            | 23.03                              |
| 21             | Monsanto Process                   | 40.68                            | 23.31                              |
| 22             | Dehydration of Alcohols 1          | 40.50                            | 23.21                              |
| 23             | Dehydration of Alcohols 2          | 37.47                            | 21.47                              |
| 24             | Dehydration of Alcohols 3          | 34.45                            | 19.74                              |
| 25             | Decarboxylation of Acids           | 45.94                            | 26.32                              |
| 26             | Fractional Distillation of Alkanes | 169.48                           | 98.22                              |

**Table S4.** List of Component with Heat of Formation and Potency Factor

| <b>Component</b>      | <b>MW</b> | <b>Heat of Formation (kJ/mol)</b> | <b>Potency Factor</b> |
|-----------------------|-----------|-----------------------------------|-----------------------|
| Lignin                | 151.50    | -8124.62                          | 0.00                  |
| Cellulose             | 162.14    | -6603.33                          | 0.00                  |
| Hemicellulose (xylan) | 132.12    | -5458.74                          | 0.00                  |
| Ammonia               | 17.03     | -45.94                            | 2.45                  |
| Ethyl benzoate        | 150.17    | -285.00                           | 0.00                  |
| Water                 | 18.02     | -285.83                           | 0.00                  |
| Furfural              | 96.08     | -200.20                           | 11.00                 |
| HMF                   | 126.11    | -277.20                           | 11.00                 |
| Glucose               | 180.16    | -1275.00                          | 0.00                  |
| Ethanol               | 46.07     | -234.00                           | 11.45                 |
| Carbon dioxide        | 44.01     | -393.52                           | 1.00                  |
| Hydrogen              | 2.02      | 0.00                              | 0.00                  |
| THFA                  | 102.13    | -505.59                           | 11.00                 |
| Oxygen                | 32.00     | 0.00                              | 0.00                  |
| Carbon monoxide       | 28.01     | -110.53                           | 3.03                  |
| methane               | 16.04     | -74.87                            | 32.03                 |
| Nitrogen              | 28.04     | 0.00                              | 0.00                  |
| Methanol              | 32.04     | -238.40                           | 12.71                 |
| Acetic acid           | 60.05     | -483.52                           | 12.25                 |
| Ethane                | 30.07     | -84.00                            | 11.14                 |
| Propanol              | 60.09     | -302.54                           | 11.22                 |
| Propane               | 44.10     | -104.70                           | 11.41                 |
| Pentanol              | 88.15     | -298.00                           | 11.00                 |
| Pentane               | 72.15     | -146.80                           | 12.22                 |

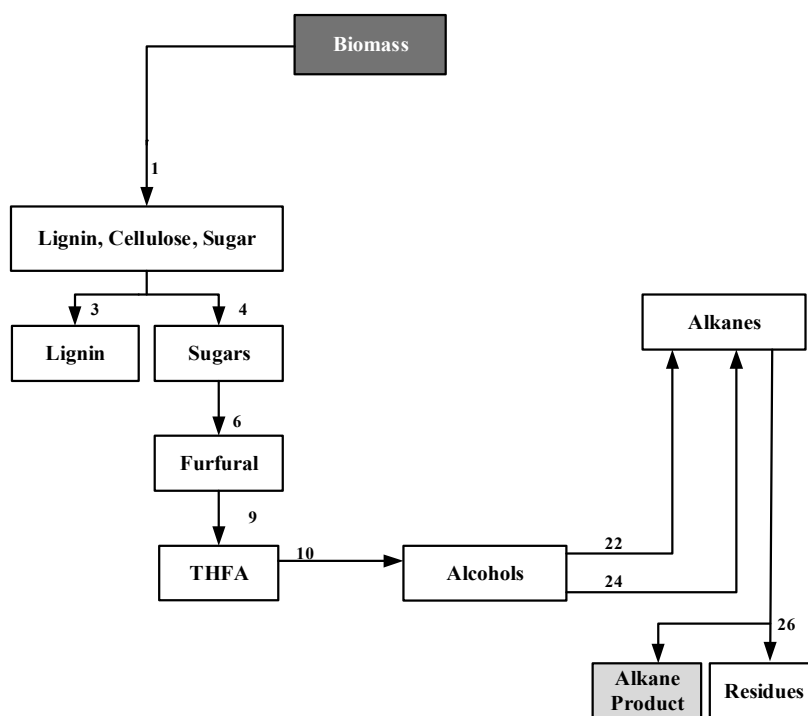

**Figure S1.** Conversion Pathway for Maximum Economic Performance, Minimum Environmental Burden and Minimum Energy Consumption

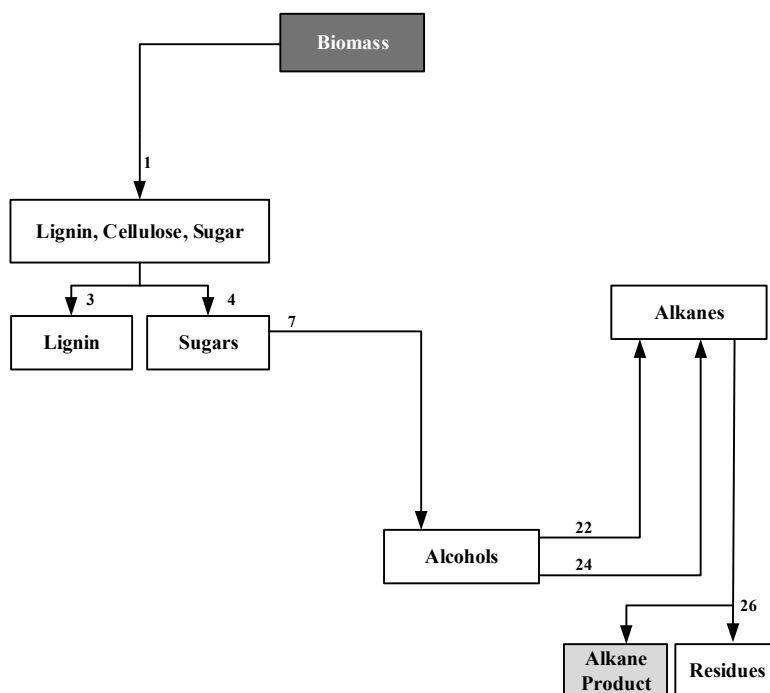

**Figure S2.** Conversion Pathway for Maximum Product C11 Yield

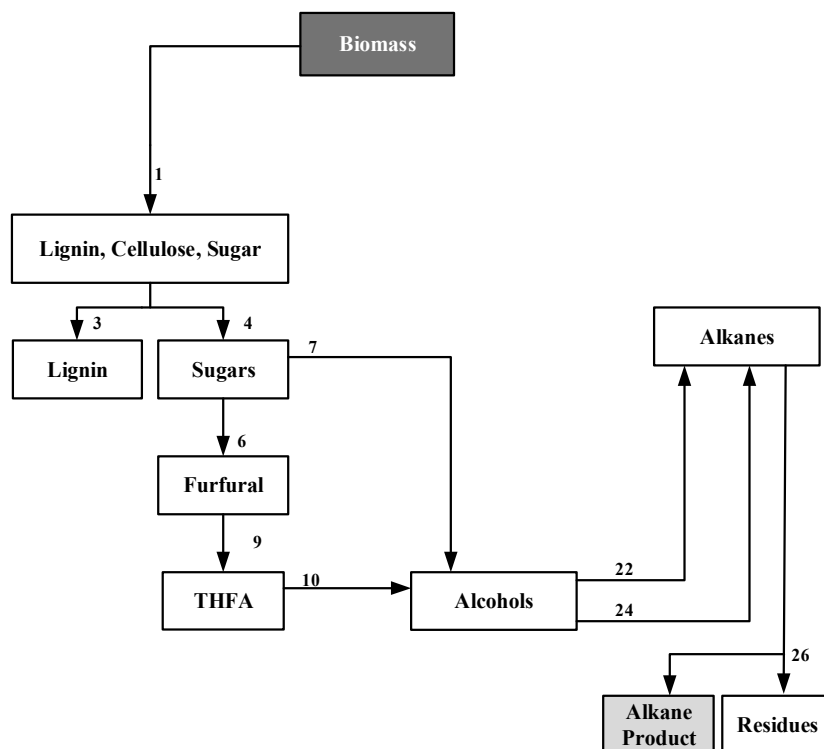

**Figure S3.** Conversion Pathway for Multi-objective Optimisation

## References

1. Ng, L.Y.; Chemmangattuvalappil, N.G.; Ng, D.K.S. Robust chemical product design via fuzzy optimization approach. *Comput. Aided Chem. Eng.* **2014**, *34*, 387–392.
2. Andiappan, V.; Ko, A.S.Y.; Lau, V.W.S.; Ng, L.Y.; Ng, R.T.L.; Chemmangattuvalappil, N.G.; Ng, D.K.S. Synthesis of Sustainable Integrated Biorefinery via Reaction Pathway Synthesis: Economic, Incremental Environmental Burden and Energy Assessment with Multiobjective Optimization. *AIChE J.* **2015**, *61*, 132–146.
